# Supplementary material for: High frequency of HIV precursor-target-specific B cells in sub-Saharan populations
Source: PubMed Central journal article supplement — Cell Rep. Author manuscript; Available in PMC 2024 Feb 23. (PMC10886445; doi:10.1016/j.celrep.2023.113450), 2023-11-28
Supplement: NIHMS1954757-supplement-1.pdf [file NIHMS1954757-supplement-1.pdf]

**Supplemental information**

**High frequency of HIV precursor-target-specific**

**B cells in sub-Saharan populations**

**Flavio Matassoli, Alberto Cagigi, Chen-Hsiang Shen, Amy R. Henry, Timothy S. Johnston, Chaim A. Schramm, Christopher A. Cottrell, Oleksandr Kalyuzhnyi, Abby Spangler, Leigh Eller, Merlin Robb, Michael Eller, Prossy Naluyima, Peter D. Kwong, Daniel C. Douek, William R. Schief, Sarah F. Andrews, and Adrian B. McDermott**

## Supplementary Materials for

### **Increased frequency of HIV precursor-target specific B cells in sub-Saharan populations**

Matassoli *et al.*

Corresponding authors:

Flavio Matassoli ([matassolifl@nih.gov](mailto:matassolifl@nih.gov))

Sarah Andrews ([sarah.andrews2@nih.gov](mailto:sarah.andrews2@nih.gov))

This PDF file includes:

Fig. S1 – Flow cytometry gate schema used to identify and sort eOD-GT8+ naïve B cells.

Fig. S2 – LC CDRL3 length when paired with a VH1-2 HC in each cohort.

Fig. S3 – Common overall naïve Ig features among African and Non-African cohorts.

Table S1 – Study participant demographics.

Table S2 – CD4bs antibody signature criteria used in the study.

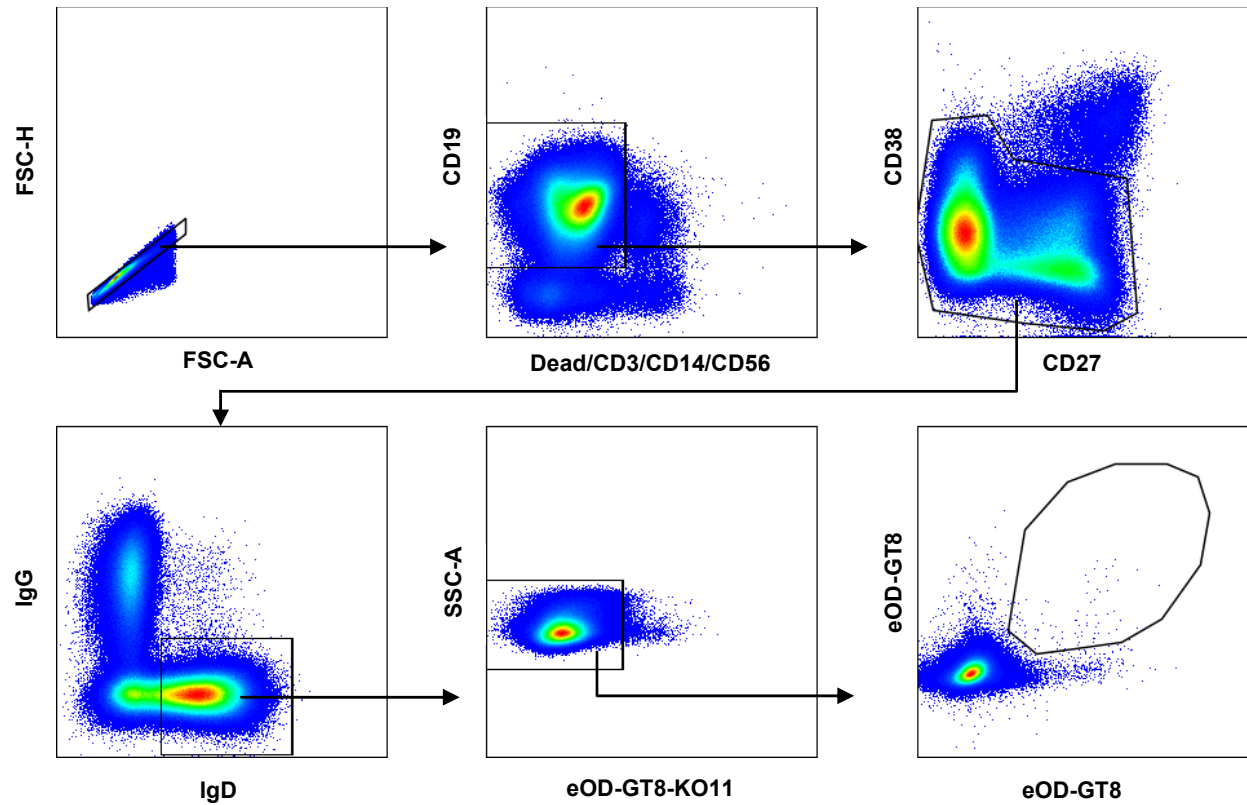

**Fig. S1 – Gate schema used to identify and sort eOD-GT8<sup>+</sup> naïve B cells.** Cells that were CD19<sup>+</sup> CD27<sup>+</sup> CD38<sup>lo</sup> IgD<sup>+</sup> eOD-GT8-KO11<sup>-</sup> and double positive for eOD-GT8 were considered eOD-GT8-specific naïve B cells and were single-cell sorted for sequencing.

A

US CDRL Length frequency

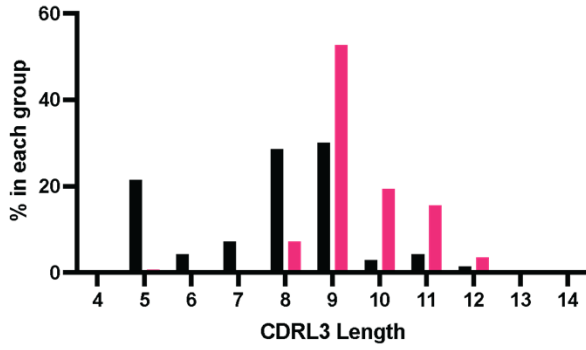

B

South Africa CDRL Length frequency

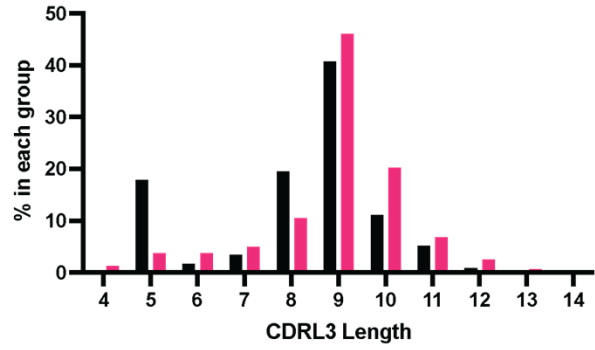

C

Uganda CDRL Length frequency

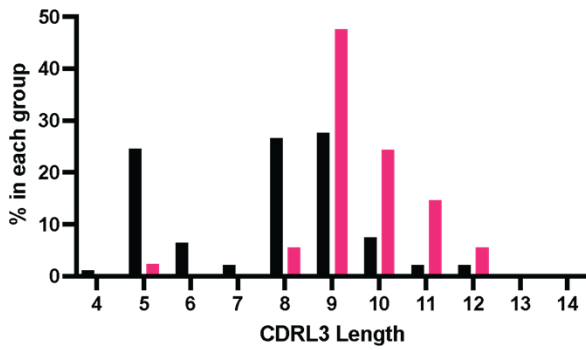

D

Rwanda CDRL Length frequency

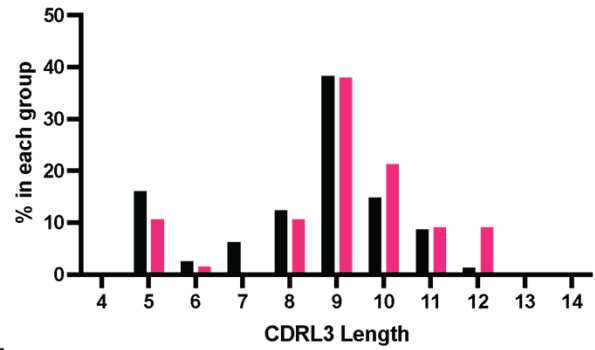

E

Tanzania CDRL Length frequency

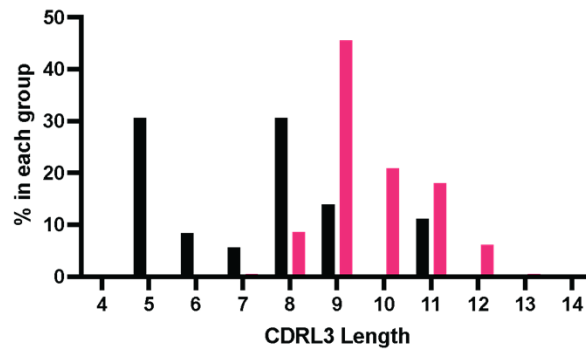

F

Kenya CDRL Length frequency

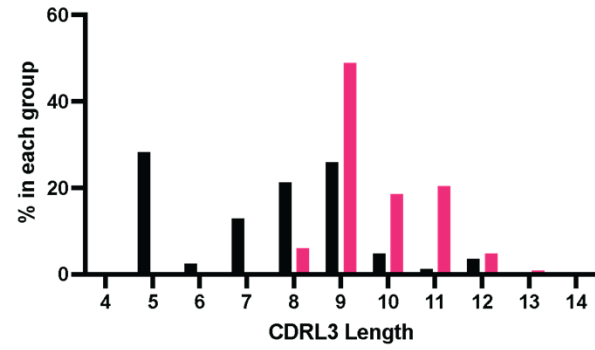

G

Thailand CDRL Length frequency

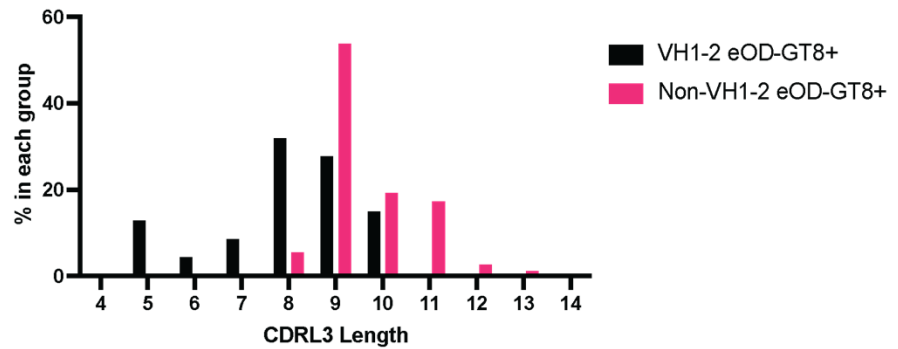

**Fig. S2 – Enrichment of 5aa CDRL3 LCs when paired with VH1-2 HCs.** (A-G)  
Frequency of eOD-GT8-specific naïve B cells CDRL3 length paired with a VH1-2 HC (Pink) or non-VH1-2 HC (Black) from US (A), South Africa (B), Uganda (C), Rwanda (D), Tanzania (E), Kenya (F) and Thailand (G).

A

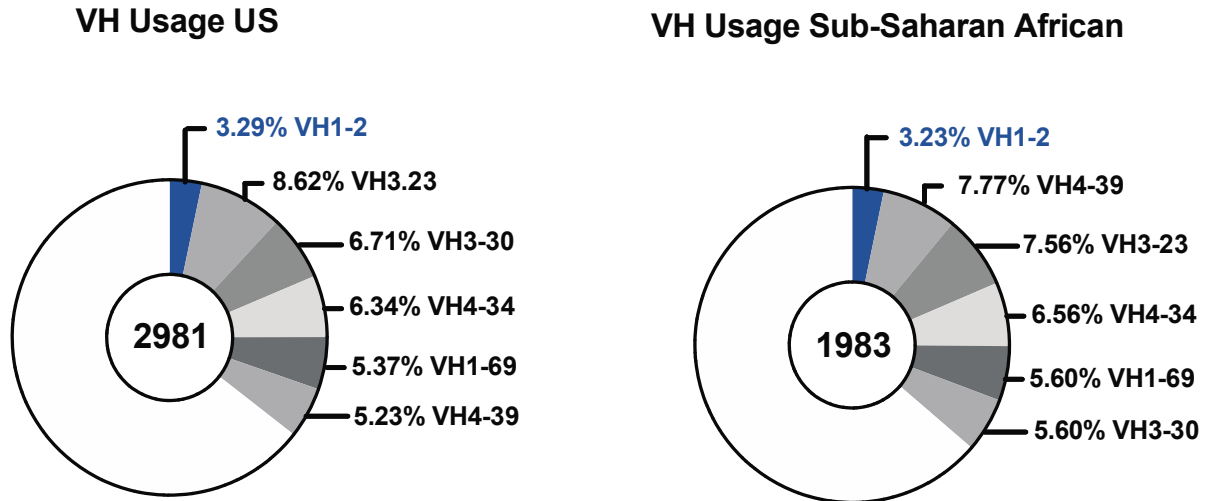

B

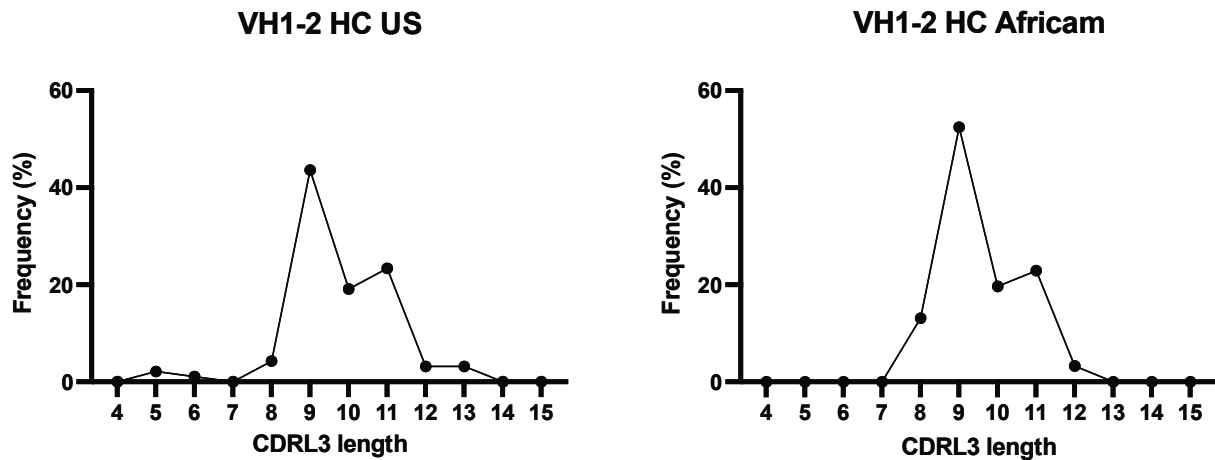

**Fig. S3 – Common overall naïve Ig features among African and non-African cohorts.** (A) Pie chart of VH usage among total naïve B cells from US and sub-Saharan African cohorts – the blue slice indicates the VH1-2 gene and grey shades indicate the other most frequent VH genes. Total B cell sequences are indicated at the center of each pie chart. (B) Frequency of sequences with a LC with the indicated CDR3 length paired with a VH1-2 HC from US and sub-Saharan African cohorts shown in (A).

| Country      | Study ID | Total cells (Millions) | Age | Gender      | Sequences analyzed |
|--------------|----------|------------------------|-----|-------------|--------------------|
| Uganda       | 10006    | 94                     | 25  | Female      | 35                 |
| Uganda       | 10059    | 82.4                   | 36  | Female      | 45                 |
| Uganda       | 10123    | 82.88                  | 37  | Female      | 62                 |
| Uganda       | 10176    | 82.4                   | 19  | Female      | 34                 |
| Uganda       | 10465    | 89.6                   | 19  | Female      | 61                 |
| Uganda       | 10470    | 82.4                   | 29  | Female      | 31                 |
| Uganda       | 10600    | 81.6                   | 27  | Female      | 23                 |
| Uganda       | 10694    | 62.4                   | 27  | Male        | 16                 |
| Uganda       | 10696    | 86.4                   | 23  | Male        | 20                 |
| Uganda       | 10703    | 71.4                   | 24  | Male        | 19                 |
| Uganda       | 10709    | 60.6                   | 25  | Male        | 16                 |
| Uganda       | 10714    | 82.4                   | 23  | Male        | 35                 |
| Kenya        | 20227    | 100                    | 24  | Female      | 19                 |
| Kenya        | 20420    | 84                     | 18  | Female      | 18                 |
| Kenya        | 20446    | 86.4                   | 22  | Female      | 25                 |
| Kenya        | 20459    | 86.4                   | 19  | Female      | 75                 |
| Kenya        | 20475    | 80                     | 23  | Female      | 23                 |
| Kenya        | 20476    | 80                     | 22  | Female      | 47                 |
| Kenya        | 20526    | 82.4                   | 21  | Female      | 111                |
| Kenya        | 20695    | 80                     | 26  | Female      | 17                 |
| Kenya        | 20985    | 82.16                  | 26  | Female      | 85                 |
| Tanzania     | 30162    | 80                     | 32  | Female      | 9                  |
| Tanzania     | 30210    | 80                     | 25  | Female      | 9                  |
| Tanzania     | 30407    | 80                     | 24  | Female      | 42                 |
| Tanzania     | 30567    | 80                     | 37  | Female      | 15                 |
| Tanzania     | 30553    | 80                     | 25  | Female      | 60                 |
| Tanzania     | 30469    | 80                     | 25  | Female      | 13                 |
| Tanzania     | 30485    | 70                     | 20  | Female      | 8                  |
| Tanzania     | 30521    | 80                     | 27  | Female      | 91                 |
| Thailand     | 40015    | 80                     | 34  | Female      | 63                 |
| Thailand     | 40297    | 80                     | 36  | Female      | 71                 |
| Thailand     | 40053    | 80                     | 35  | Female      | 82                 |
| Thailand     | 40080    | 80                     | 40  | Female      | 34                 |
| Thailand     | 40087    | 80                     | 39  | Female      | 33                 |
| Thailand     | 40124    | 80                     | 24  | Male        | 69                 |
| Thailand     | 40180    | 80                     | 31  | Male        | 66                 |
| Thailand     | 40252    | 80                     | 26  | Male        | 68                 |
| Thailand     | 40279    | 80                     | 27  | Male        | 12                 |
| South Africa | 0055-051 | 100                    | 21  | Unavailable | 31                 |
| South Africa | 0135-111 | 100                    | 18  | Unavailable | 49                 |
| South Africa | 0149-123 | 100                    | 23  | Unavailable | 44                 |
| South Africa | 0180-142 | 100                    | 19  | Unavailable | 69                 |
| South Africa | 0271-195 | 100                    | 21  | Unavailable | 57                 |
| South Africa | 0359-249 | 100                    | 23  | Unavailable | 36                 |
| US           | 36431    | 100                    | 46  | Female      | 154                |
| US           | 42523    | 100                    | 42  | Male        | 68                 |
| US           | 36502    | 100                    | 49  | Male        | 81                 |
| US           | 42535    | 100                    | 60  | Male        | 80                 |
| US           | 30930    | 100                    | 38  | Male        | 122                |
| US           | 42092    | 100                    | 20  | Male        | 17                 |
| US           | 34718    | 100                    | 40  | Male        | 19                 |
| US           | 41472    | 100                    | 44  | Female      | 25                 |
| US           | 42181    | 100                    | 28  | Female      | 13                 |
| US           | 32859    | 100                    | 53  | Male        | 20                 |
| US           | 37344    | 100                    | 36  | Male        | 7                  |
| Rwanda       | 7002     | 100                    | 38  | Female      | 11                 |
| Rwanda       | 7008     | 100                    | 45  | Male        | 16                 |
| Rwanda       | 7034     | 100                    | 44  | Female      | 24                 |
| Rwanda       | 7037     | 100                    | 46  | Female      | 67                 |
| Rwanda       | 7038     | 100                    | 24  | Female      | 20                 |
| Rwanda       | 7043     | 100                    | 35  | Female      | 14                 |

**Table S1** – Study participant demographics.

| Antibody | VH       | VL       | CDRL3 |
|----------|----------|----------|-------|
| VRC01    | IGHV1-2  | IGKV3-20 | 5     |
| N6       | IGHV1-2  | IGKV1-33 | 5     |
| VRC-PG20 | IGHV1-2  | IGLV2-14 | 5     |
| VRC23    | IGHV1-2  | IGKV3-14 | 5     |
| IOMA     | IGHV1-2  | IGLV2-23 | 8     |
| 1-18     | IGHV1-46 | IGKV3-20 | 9     |
| B12      | IGHV1-3  | IGKV3-20 | -     |
| HJ16     | IGHV3-30 | IGKV4-1  | -     |
| CH103    | IGHV4-61 | IGLV3-1  | -     |
| VRC13    | IGHV1-69 | IGLV2-14 | -     |
| VRC16    | IGHV3-23 | IGKV1-39 | -     |
| VRC33    | IGHV4-34 | IGKV1-5  | -     |

**Table S2** –VH and VL genes assigned to each class of antibodies are tabulated. CDRL3 length is shown for the classes where that was considered an inclusion criteria.
